# Supplementary material for: Colloidal Au/iron oxide nanocrystal heterostructures: magnetic, plasmonic and magnetic hyperthermia properties
Source: Royal Society of Chemistry journal article supplement (doi:10.1039/c8tc01788c), 2018-01-01
Supplement: c8tc01788c1.pdf [file c8tc01788c1.pdf]

## Supporting Information

### **Colloidal Au/Iron Oxide Nanocrystal Heterostructures: Magnetic, Plasmonic and Magnetic Hyperthermia Properties**

Authors:

Francesco Vita, Claudia Innocenti, Andrea Secchi, Franca Albertini, Vincenzo Grillo, Angela Fiore, P. Davide Cozzoli\*, César de Julián Fernández\*

\* Corresponding author:

e-mail: : [davide.cozzoli@unisalento.it](mailto:davide.cozzoli@unisalento.it); [Cesar.dejulian@imem.cnr.it](mailto:Cesar.dejulian@imem.cnr.it).

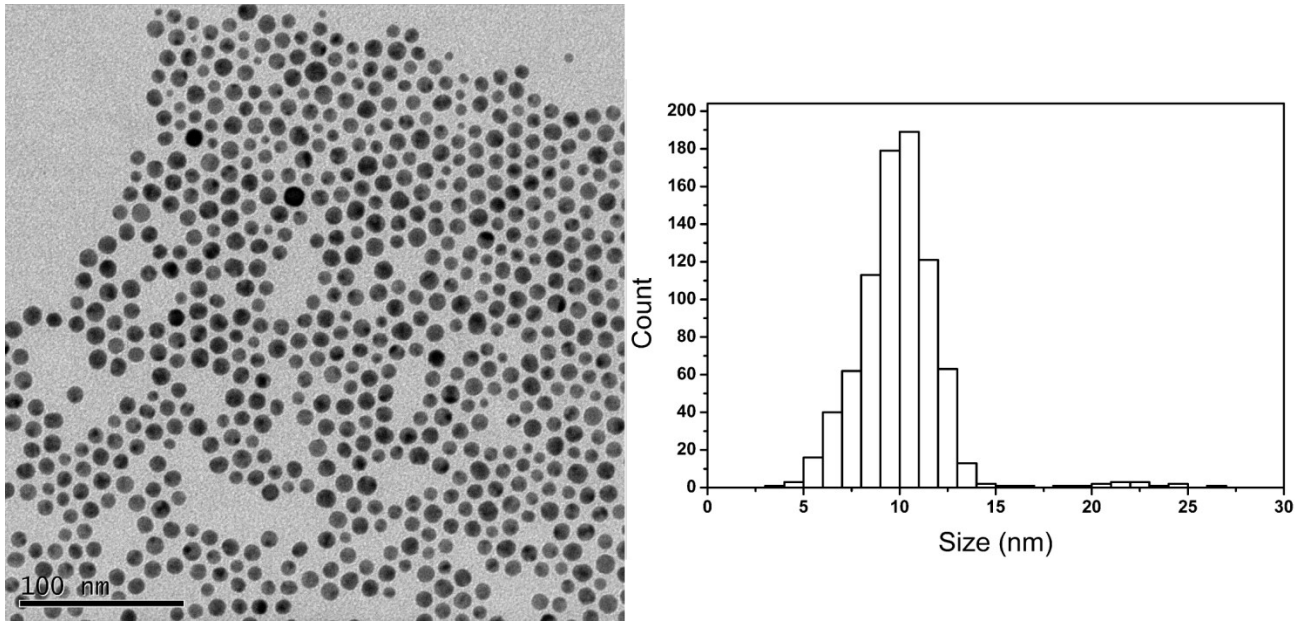

**Figure S1** TEM micrograph of Au seeds and corresponding particle size distribution

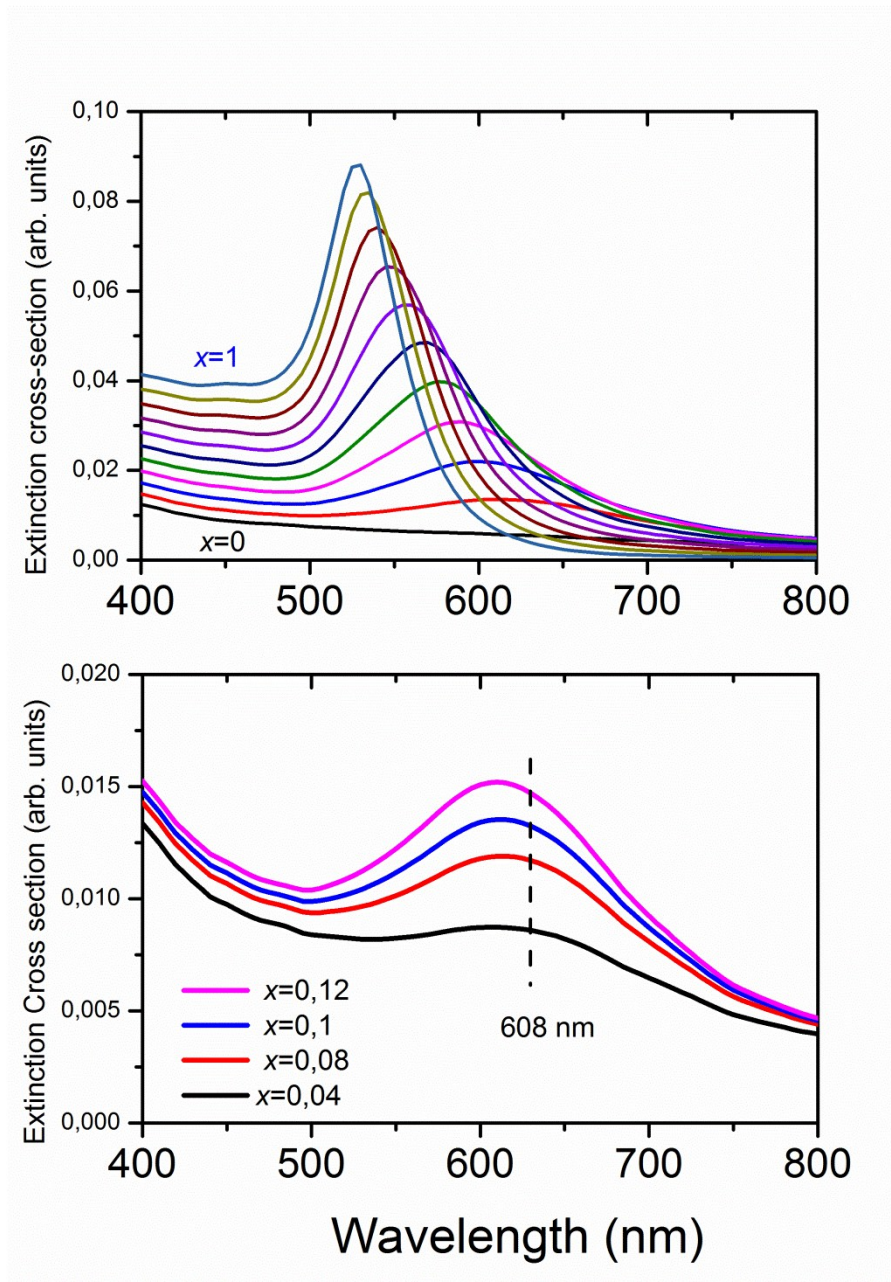

**Figure S2** (top) Simulated extinction cross section of Au@Fe<sub>3</sub>O<sub>4</sub> core@shell NHCs with different core-to-particle volume ratio,  $x$ , of Au. (bottom) Details for small  $x$  values.
